# Supplementary material for: Association of Mean Perfusion Pressure Variability and Short-Term Mortality in Critically Ill Patients
Source: Research Square preprint supplement (doi:10.21203/rs.3.rs-461359/v1), 2021-05-05
Supplement: Supplementary file 1 [file 2fbc662d030402349590a931.docx]

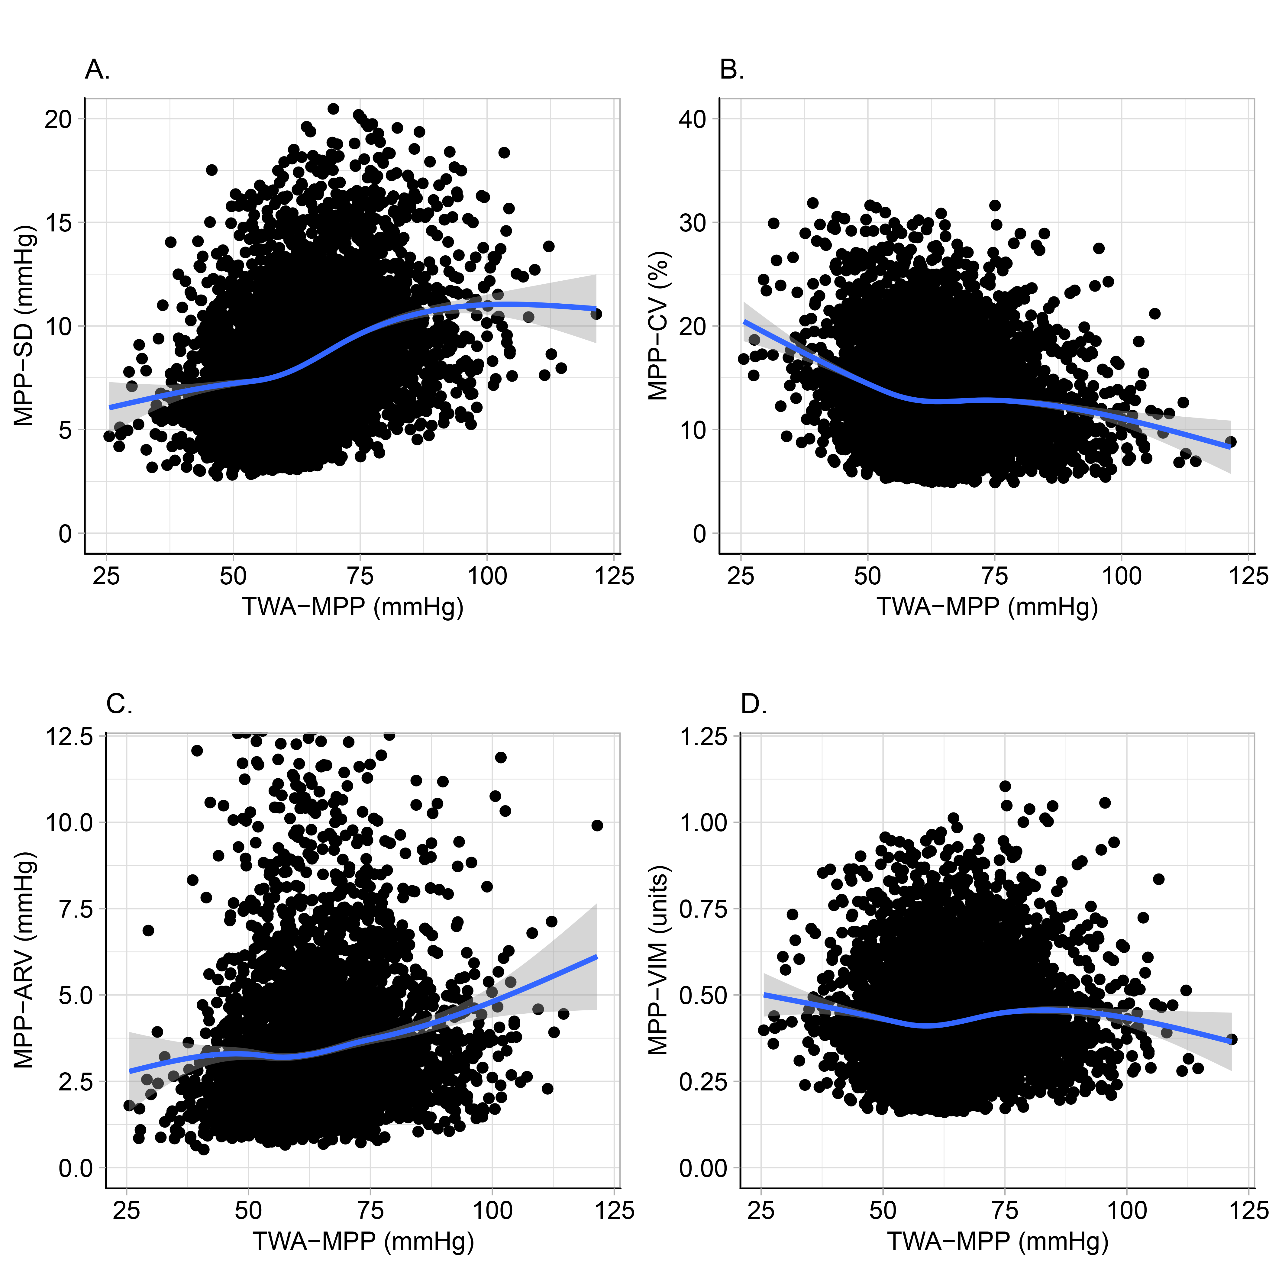


Supplementary Fig.1 The scatter plots and the fitting curves of TWA-MPP and MPPV.


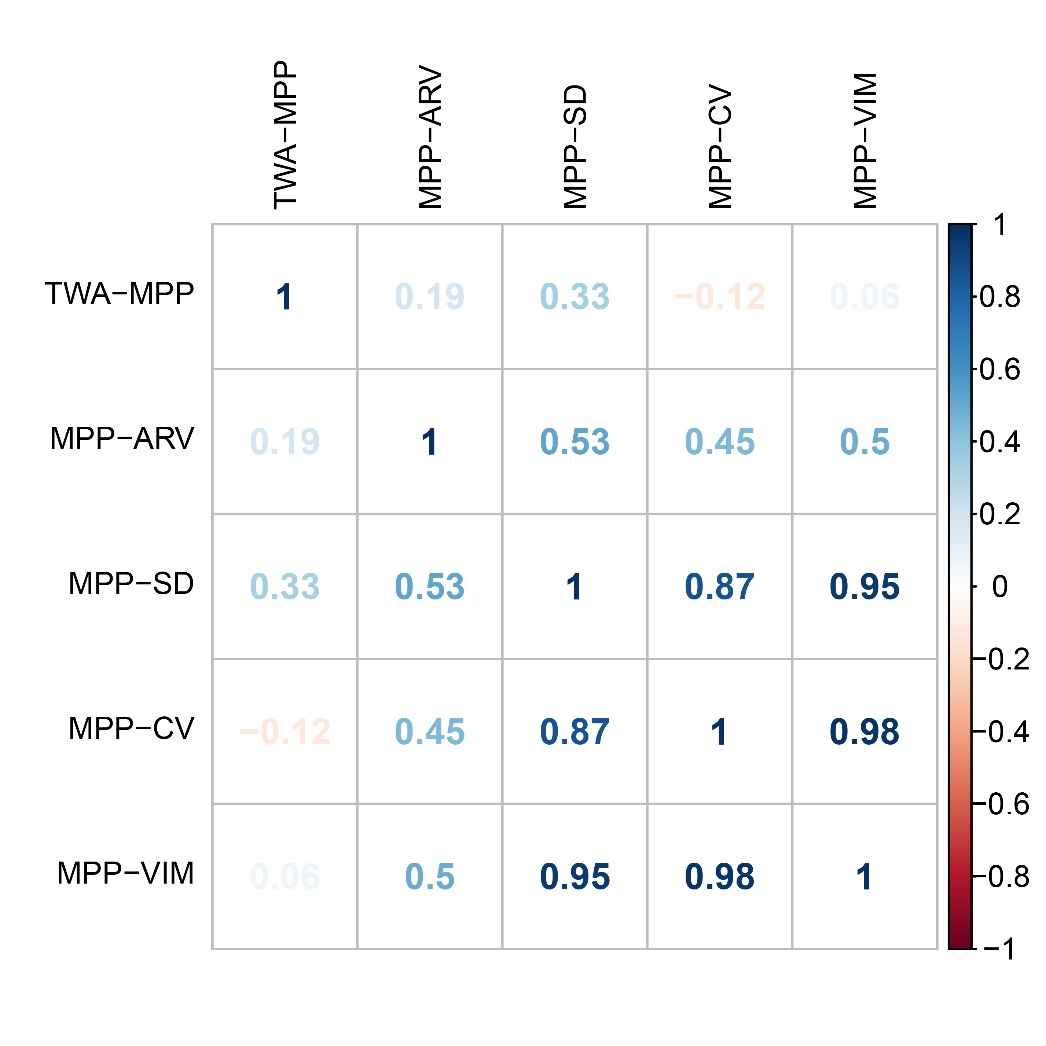


Supplementary Fig.2 Correlation matrices of TWA-MPP and MPPV.


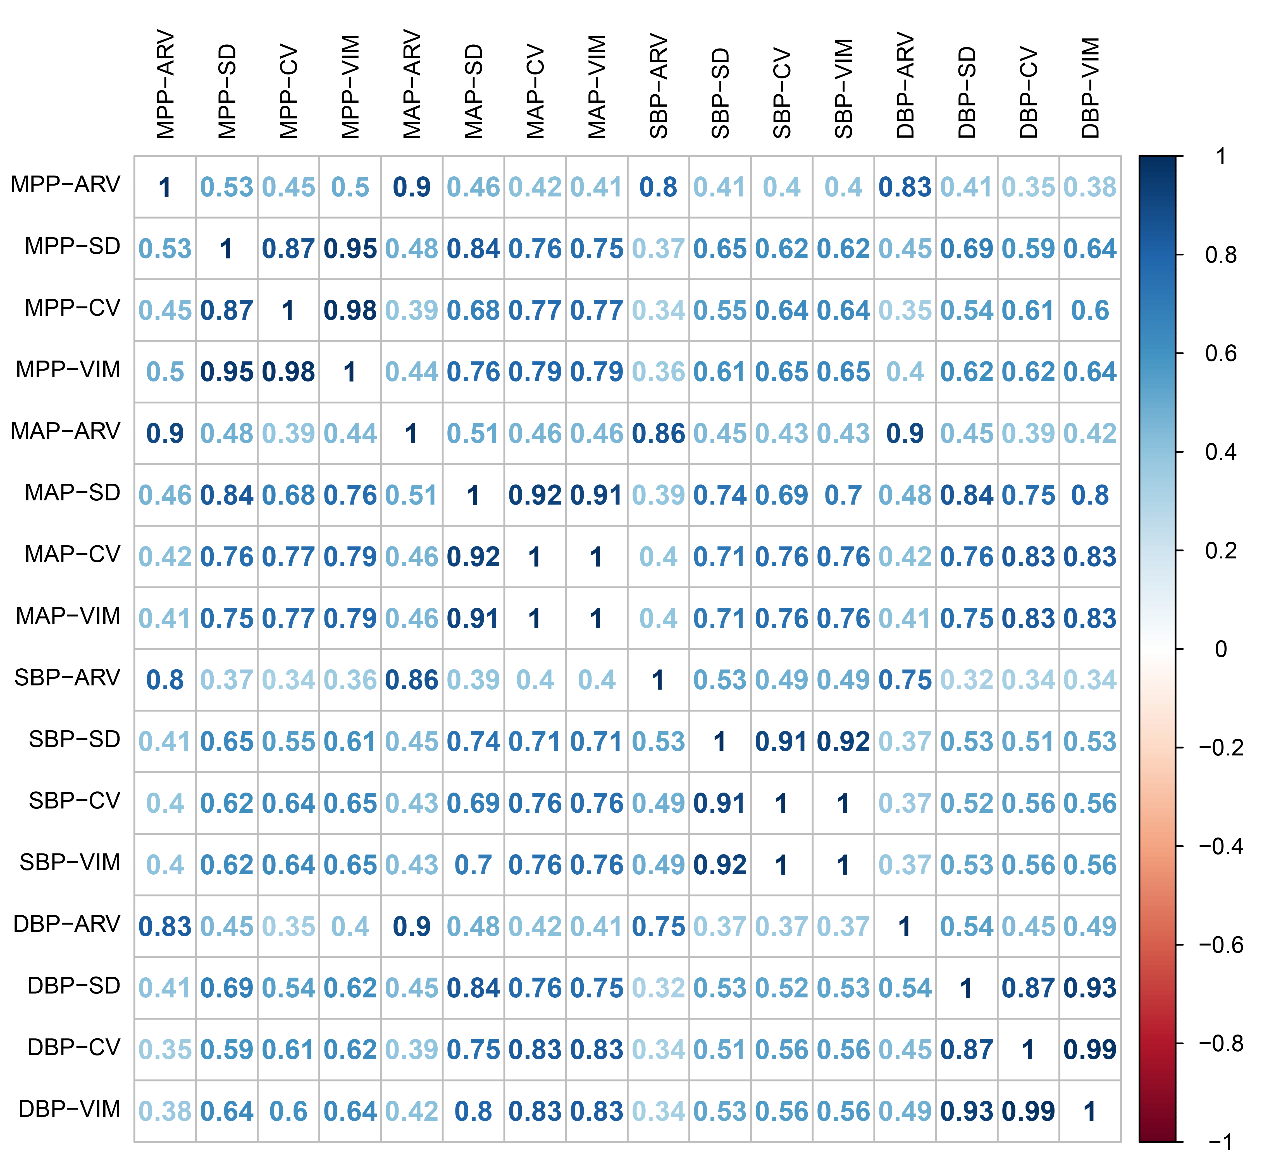


Supplementary Fig.3 Correlation matrices of MPPV and other BPV.


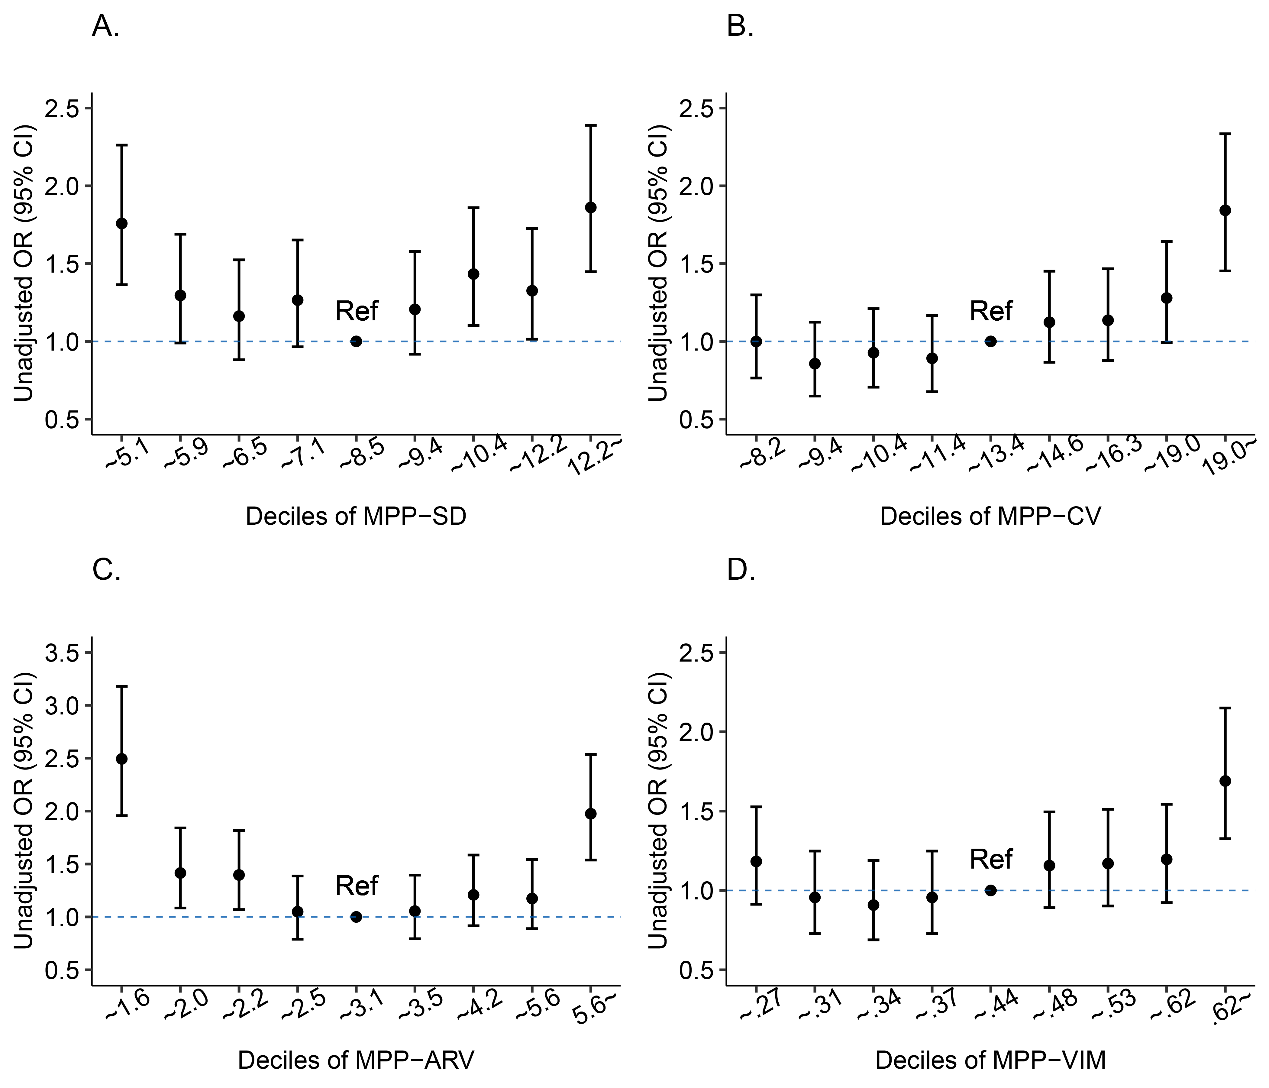


Supplementary Fig.4 The deciles of MPP variability and unadjusted odds ratio of in-hospital mortality using the fifth and sixth deciles as a reference.


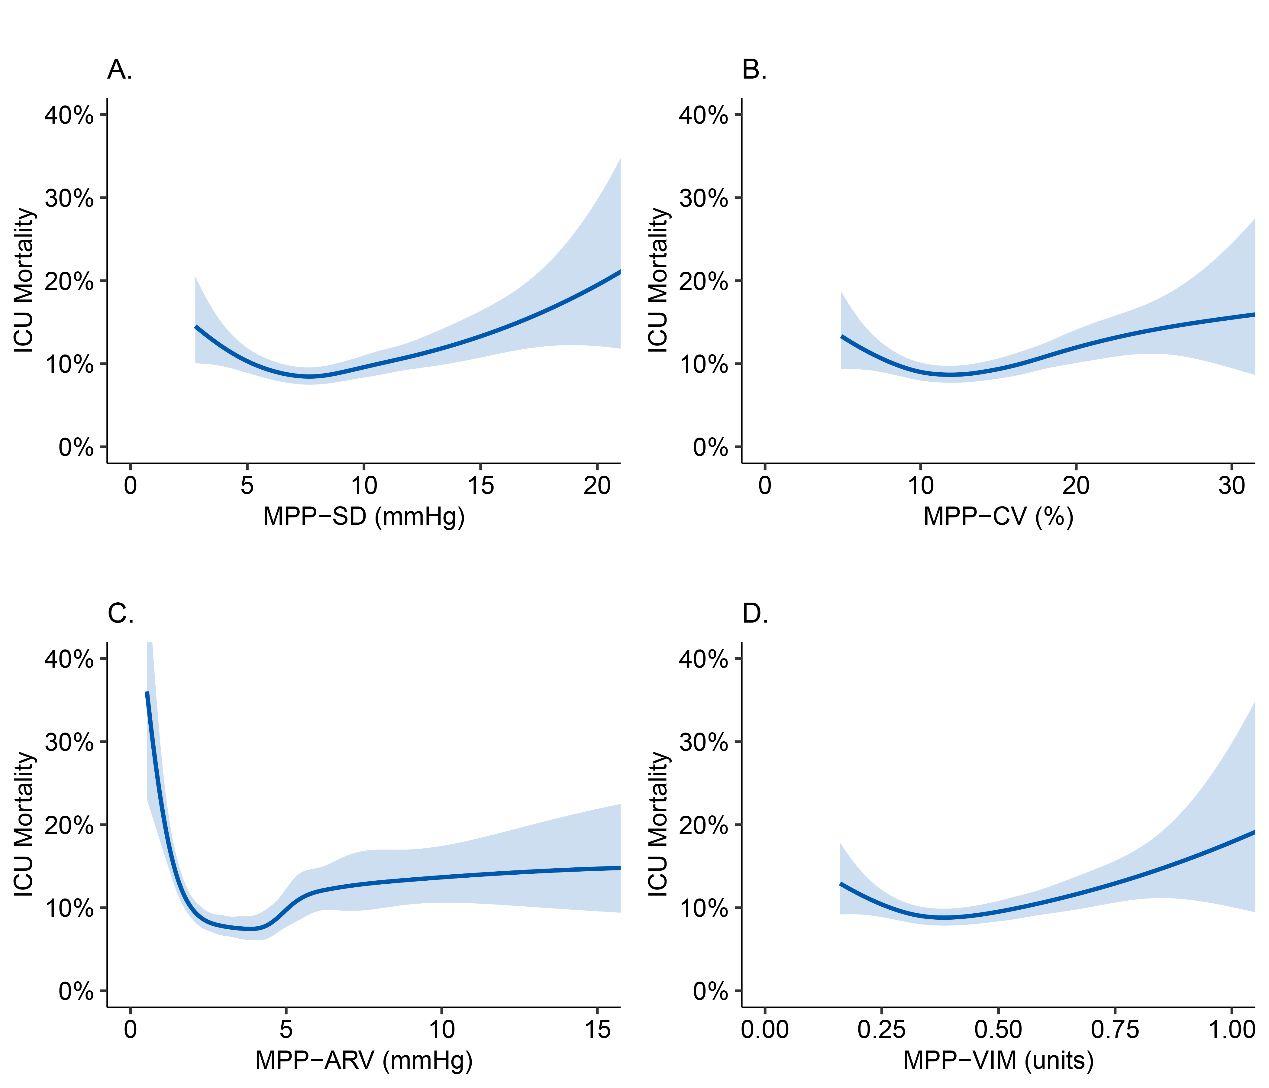


Supplementary Fig.5 The associations between adjusted ICU mortality risk and MPP variability fitted by general additive models.


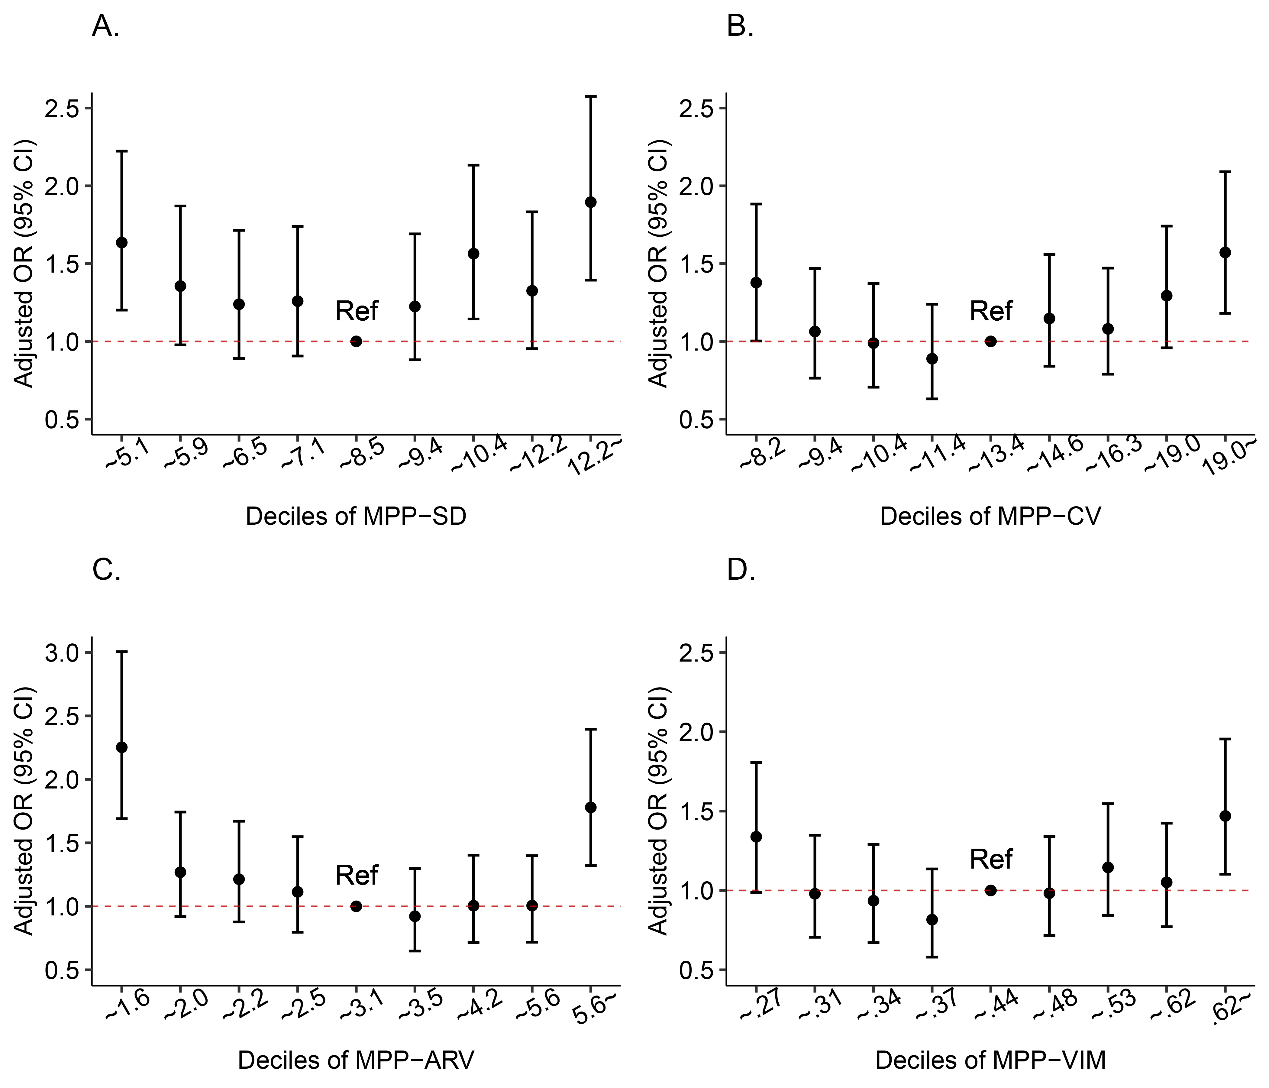


Supplementary Fig.6 The deciles of MPP variability and adjusted odds ratio of ICU mortality using the fifth and sixth deciles as a reference.


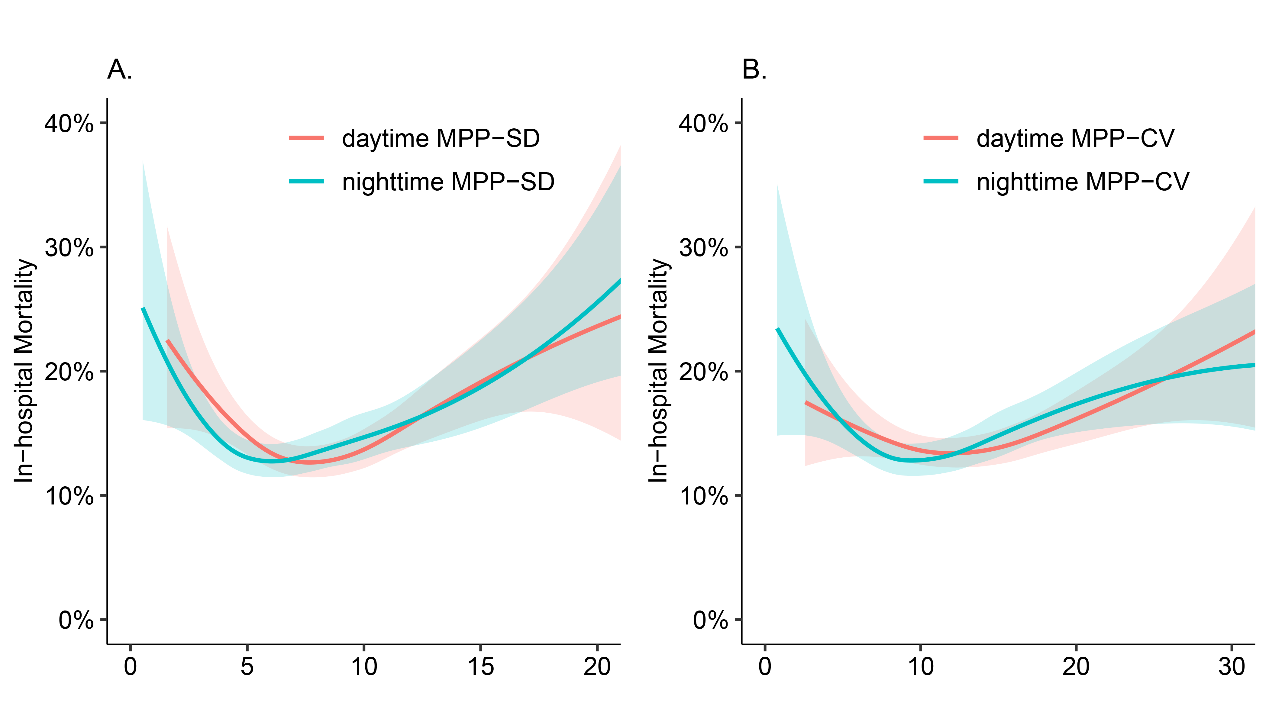


Supplementary Fig.7 The associations between adjusted in-hospital mortality risk and daytime or nighttime MPP variability fitted by general additive models.

Note: Since there was time interval in the calculation of daytime or nighttime ARV, we chose SD and CV representatively to analyze the association between day and night MPPV and hospital mortality.


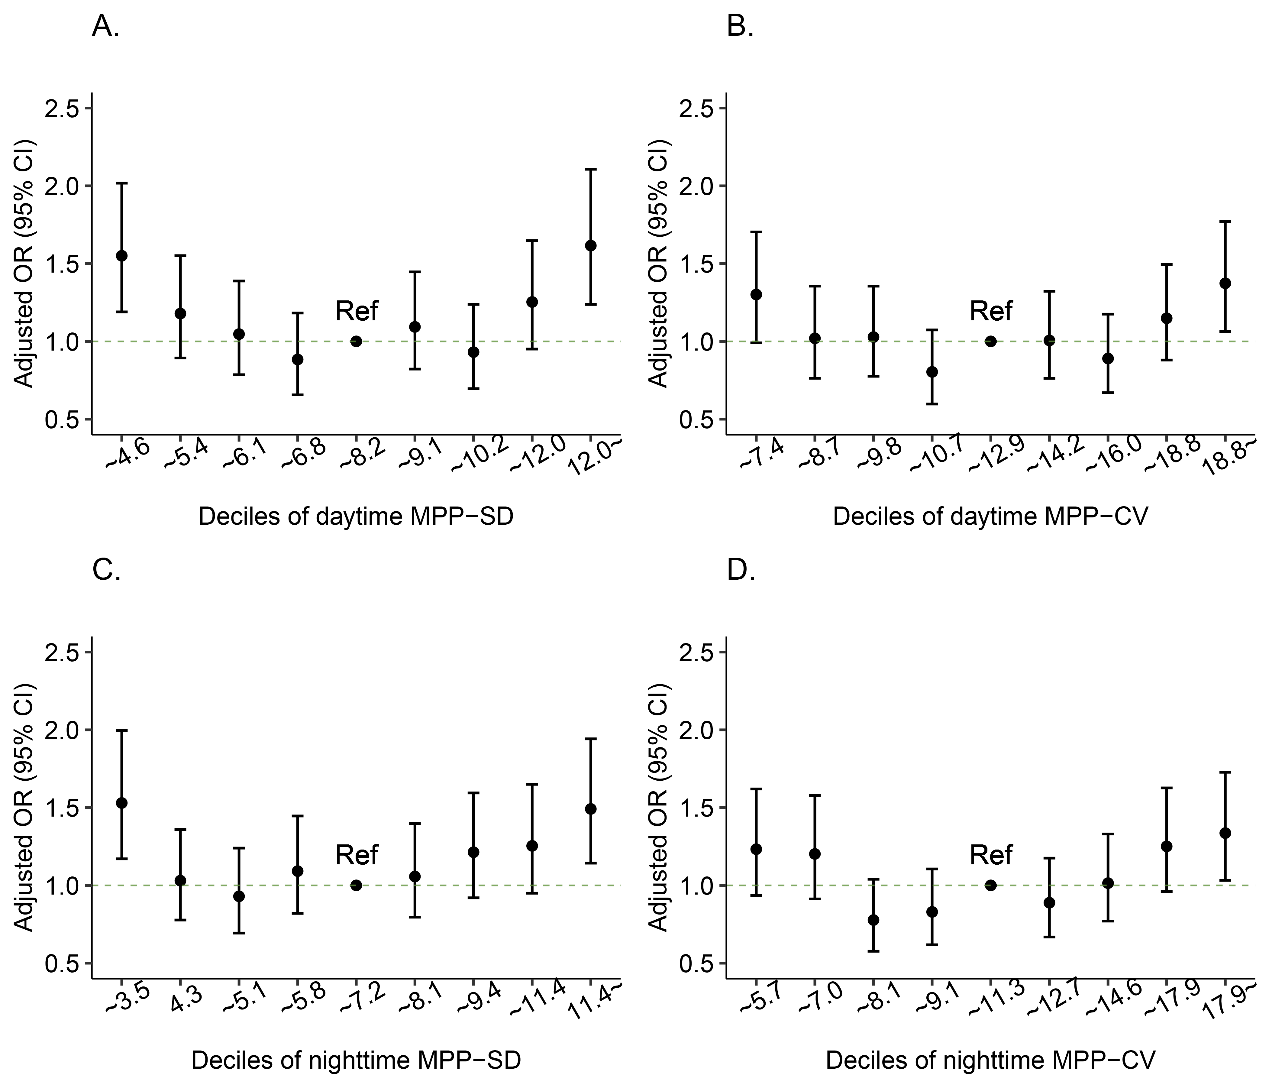


Supplementary Fig.8 The deciles of daytime or nighttime MPP variability and adjusted odds ratio of in-hospital mortality using the fifth and sixth deciles as a reference.

Note: Since there was time interval in the calculation of daytime or nighttime ARV, we chose SD and CV representatively to analyze the association between day and night MPPV and hospital mortality.


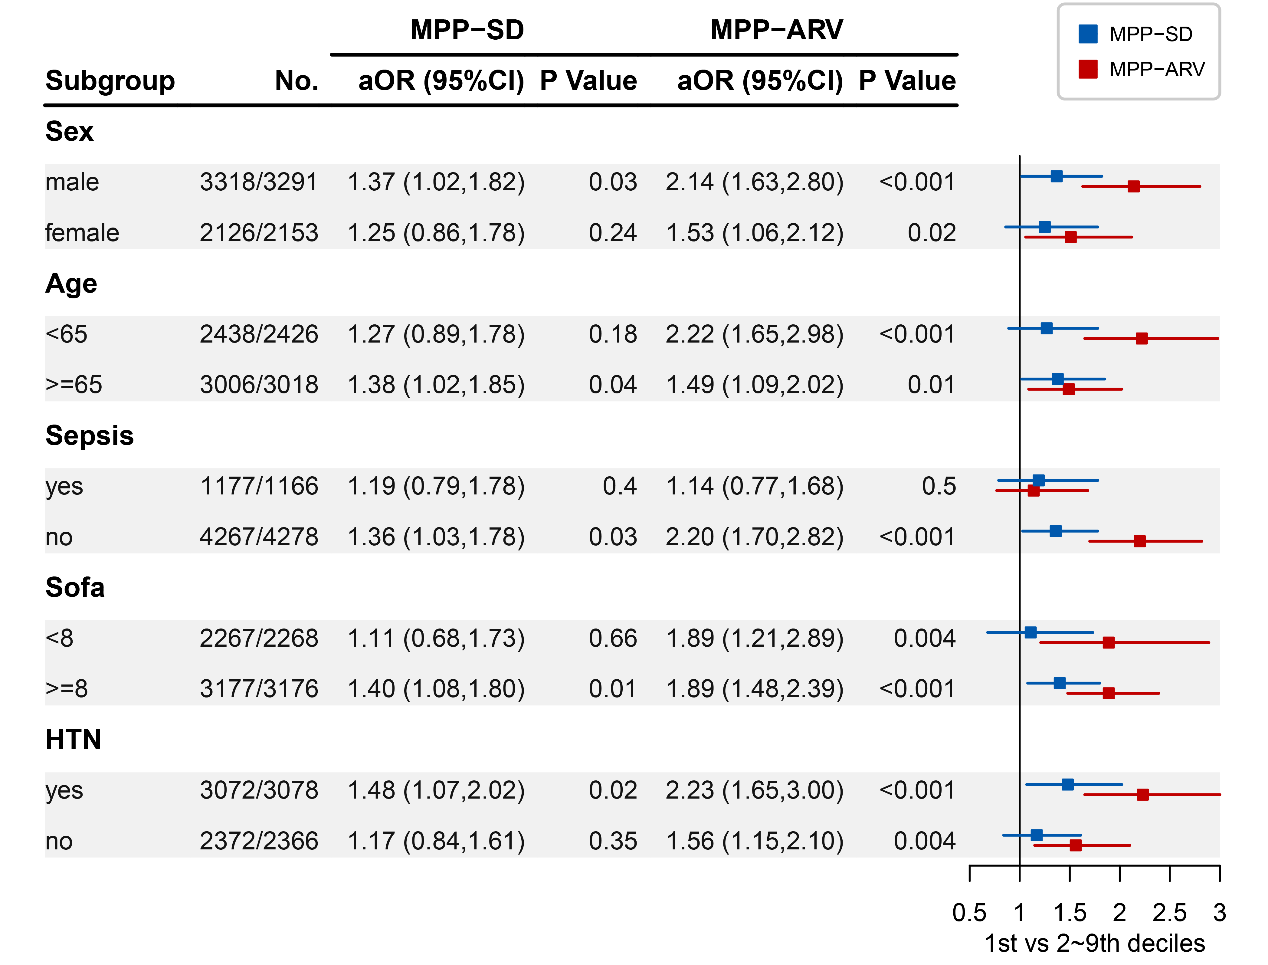


Supplementary Fig.9 Forest plot displaying the subgroup analyses of decreased MPP variability (1st decile of SD and ARV). The reference groups were 2-9th deciles of SD and ARV.

Note: Abbreviations: aOR: adjusted odds ratio; HTN: hypertension.


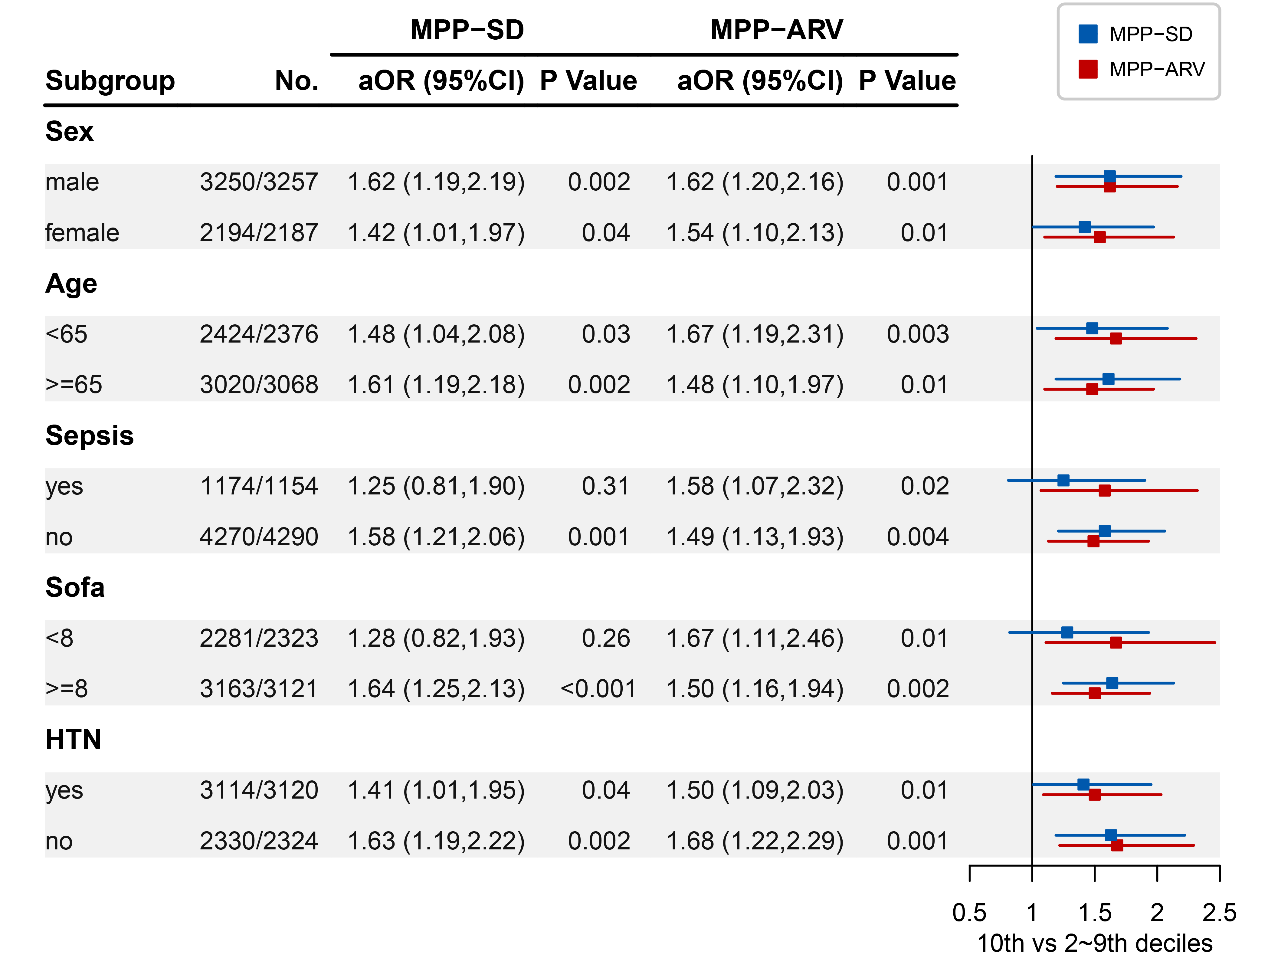


Supplementary Fig.10 Forest plot displaying the subgroup analyses of increased MPP variability (10th decile of SD and ARV). The reference groups were 2-9th deciles of SD and ARV.

Note: Abbreviations: aOR: adjusted odds ratio; HTN: hypertension.
