# Supplementary material for: Association of Mean Perfusion Pressure Variability and Short-Term Mortality in Critically Ill Patients
Source: Research Square preprint supplement (doi:10.21203/rs.3.rs-461359/v1), 2021-05-05
Supplement: Supplementary file 2 [file 8bb730eb586f0d3f0d778b3b.docx]

**Supplementary Table 1. Calculation Formula of variability parameters.**

| **Parameter** | **Formula** | **Unit** |
| --- | --- | --- |
| Standard deviation  (SD) |  | mmHg |
| Coefficient of variation  (CV) |  | none |
| Average real variability  (ARV) |  | mmHg |
| Variation independent of mean  (VIM) | k | none |

Note: n is the number of MPP readings, is the mean value and w refers to the time of each interval. For VIM, linear regression fitting log (SD) with log (x) was performed. The “k” was the exponential of β0 and the “b” was the β1 of the linear regression model.

**Supplementary Table 2. Other information of the study population.**

| Variables | N=6049 |
| --- | --- |
| Hospital size |  |
| <100 | 63 (1.0) |
| 100 - 249 | 804 (13.3) |
| 250 - 499 | 1481 (24.5) |
| >= 500 | 2905 (48.0) |
| Not available | 796 (13.2) |
| Teaching hospital | 2457 (40.6) |
| Region (%) |  |
| Midwest | 2091 (34.6) |
| Northeast | 354 (5.9) |
| South | 1663 (27.5) |
| West | 1589 (26.3) |
| Not available | 352 (5.8) |
| Initial diagnosis |  |
| Sepsis | 904 (14.9) |
| Cardiovascular | 3520 (58.2) |
| Respiratory | 436 (7.2) |
| Gastrointestinal | 522 (8.6) |
| Genitourinary | 81 (1.3) |
| Neurologic | 280 (4.6) |
| Others | 304 (5.0) |
| Comorbidities (%) |  |
| Hypertension | 3420 (56.5) |
| Diabetes | 1943 (32.1) |
| Chronic kidney disease | 822 (13.6) |
| Chronic heart failure | 1128 (18.6) |
| Malignancy | 90 (1.5) |
| MPP data |  |
| Measurement times | 284 (263,288) |
| First MPP measurement after ICU admission (minutes) | 102.0 (9.0, 563.0) |
| TWA-MPP (mmHg) | 63.0 (57.1, 69.9) |
| Mean MPP (mmHg) | 63.1 (57.1, 69.9) |
| Outcomes |  |
| In-hospital mortality (%) | 1057 (17.5) |
| ICU mortality (%) | 777 (12.8) |
| Hospital length of stay (days) | 10.8 (6.9, 18.0) |
| ICU length of stay (days) | 4.4 (2.8, 8.0) |

ICU: intensive care unit; MPP: mean perfusion pressure; TWA: time weighted-average.

**Supplementary Table 3. The comparison of the AUC between MPPV and MAPV in prediction the hospital mortality.**

|  | AUC of MPPV (95% CI) | AUC of MAPV (95% CI) |
| --- | --- | --- |
| SD | 0.51 (0.49-0.53) | 0.52 (0.50-0.54) |
| CV | 0.55 (0.53-0.57) | 0.50 (0.48-0.52) |
| ARV | 0.52 (0.50-0.54) | 0.54 (0.52-0.56) |
| VIM | 0.54 (0.52-0.56) | 0.50 (0.48-0.52) |

AUC: area under the curve; CI: confidence interval; MPPV: mean perfusion pressure variability; MAPV: mean arterial pressure variability.
